# Supplementary material for: The role of defect-modulated HKUST-1 MOF nodes in non-oxidative ethanol dehydrogenation: an observed phenomenon of catalyst transfiguration
Source: Royal Society of Chemistry journal article supplement (doi:10.1039/d4dt03300k), 2025-01-01
Supplement: d4dt03300k1.pdf [file d4dt03300k1.pdf]

# Supplementary Information

## The Role of Defect-Modulated HKUST-1 MOF Nodes in Non-Oxidative Ethanol Dehydrogenation : An Observed Phenomenon of Catalyst Transfiguration

Anjali Ganai and Pranab Sarkar\*

*Department of Chemistry, Visva-Bharati University, Santiniketan 731235, India*

E-mail: pranab.sarkar@visva-bharati.ac.in

### Contents

|                                                                                                       |           |
|-------------------------------------------------------------------------------------------------------|-----------|
| <b>S1 Details on the Structure of HKUST-1(OH)</b>                                                     | <b>S3</b> |
| <b>S2 Microkinetic Modelling Analysis</b>                                                             | <b>S4</b> |
| S2.1 Calculation of Sabatier Rate for Acetaldehyde Formation via. Path-a over<br>HKUST-1(H) . . . . . | S4        |
| S2.2 Calculation of Sabatier Rate for Acetaldehyde Formation via. Path-b over<br>HKUST-1(H) . . . . . | S5        |
| S2.3 Calculation of Sabatier Rate for Acetaldehyde Formation via. Path-c over<br>HKUST-1(H) . . . . . | S6        |
| <b>S3 Optimized Structures</b>                                                                        | <b>S7</b> |

## S1 Details on the Structure of HKUST-1(OH)

In order to confirm the placement of -OH group in defective HKUST-1(OH), we tried to optimize a structure of defective HKUST-1(OH) where the -OH group is attached to one Cu centre (instead of the bridging mode). However, the optimization process ended with the -OH group placed symmetrically between two Cu-centres in a bridging fashion.

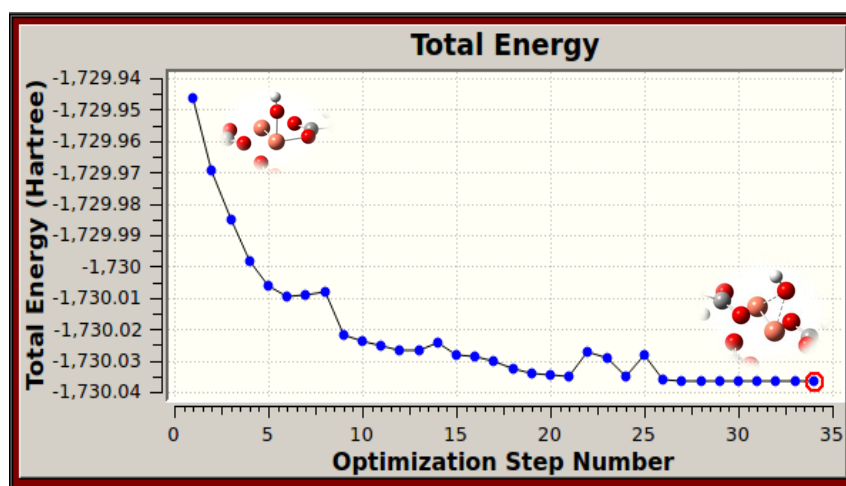

Figure S1: Optimized structures involved in acetaldehyde synthesis via. path-a over HKUST-1(H) MOF node. [Colour code- Cu: orange; O: red; C: grey; H: white]

## S2 Microkinetic Modelling Analysis

The microkinetic model used here is in accordance with what has been used by Xue et al. in their computational study on CO oxidation reaction.<sup>1</sup>

### S2.1 Calculation of Sabatier Rate for Acetaldehyde Formation via Path-a over HKUST-1(H)

The microkinetic model is represented as follows:

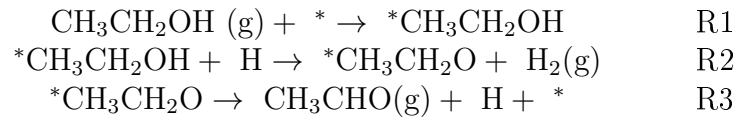

$$\text{rate}(\text{R1}) = k_{\text{for},1} p_{\text{ethanol}} \theta_* - k_{\text{rev},1} \theta_{\text{CH}_3\text{CH}_2\text{OH}}$$

$$\text{rate}(\text{R2}) = k_{\text{for},2} \theta_{\text{CH}_3\text{CH}_2\text{OH}} - k_{\text{rev},2} \theta_{\text{CH}_3\text{CH}_2\text{O}} p_{\text{H}_2}$$

$$\text{rate}(\text{R3}) = k_{\text{for},3} \theta_{\text{CH}_3\text{CH}_2\text{O}} - k_{\text{rev},3} \theta_* p_{\text{acetaldehyde}}$$

On the basis of calculated Gibbs free energy profile R3 step is assumed to be the rate determining step while all other steps (R1 and R2) are treated as quasi-equilibrium. The rate R1 and R2 can be written as follows:

$$\begin{aligned}
 \text{rate}(\text{R1}) &= k_{\text{for},1} p_{\text{ethanol}} \theta_* - k_{\text{rev},1} \theta_{\text{CH}_3\text{CH}_2\text{OH}} = 0 \\
 &\implies \theta_{\text{CH}_3\text{CH}_2\text{OH}} = K_{\text{eq},1} p_{\text{ethanol}} \theta_* \\
 \text{rate}(\text{R2}) &= k_{\text{for},2} \theta_{\text{CH}_3\text{CH}_2\text{OH}} - k_{\text{rev},2} \theta_{\text{CH}_3\text{CH}_2\text{O}} p_{\text{H}_2} = 0 \\
 &\implies \theta_{\text{CH}_3\text{CH}_2\text{O}} = K_{\text{eq},2} \frac{\theta_{\text{CH}_3\text{CH}_2\text{OH}}}{p_{\text{H}_2}} = K_{\text{eq},2} \frac{\theta_*}{p_{\text{H}_2}} K_{\text{eq},1} p_{\text{ethanol}}
 \end{aligned}$$

where  $K_{\text{eq},i}$  is the equilibrium constant for  $R_i$  and  $p_{\text{ethanol}}$ ,  $p_{\text{acetaldehyde}}$  and  $p_{\text{H}_2}$  are the partial pressures of ethanol, acetaldehyde and  $\text{H}_2$  molecule respectively.  $k_{\text{for},i}$  and  $k_{\text{rev},i}$  are

the forward and reverse reaction rate constants for  $R_i$ .

The sum of coverage of all the species must be equal to 1. Therefore,

$$\begin{aligned}\theta_* + \theta_{\text{CH}_3\text{CH}_2\text{OH}} + \theta_{\text{CH}_3\text{CH}_2\text{O}} &= 1 \\ \implies \theta_* [1 + K_{\text{eq},1} p_{\text{ethanol}} + K_{\text{eq},1} K_{\text{eq},2} \frac{p_{\text{ethanol}}}{p_{\text{H}_2}}] &= 1 \\ \implies \theta_* &= \frac{1}{1 + K_{\text{eq},1} p_{\text{ethanol}} + K_{\text{eq},1} K_{\text{eq},2} \frac{p_{\text{ethanol}}}{p_{\text{H}_2}}}\end{aligned}$$

The reaction rate R3 can be defined as follows:  $\text{rate}(\text{R3}) = k_{\text{for},3} \theta_{\text{CH}_3\text{CH}_2\text{O}} - k_{\text{rev},3} \theta_* p_{\text{acetaldehyde}}$ . Since acetaldehyde pressure is low and readsorption of acetaldehyde is negligible (as is evident from the reaction profile diagrams), R3 can be rewritten as

$$\begin{aligned}\text{rate}(\text{R3}) &= k_{\text{for},3} \theta_{\text{CH}_3\text{CH}_2\text{O}} \\ &= \frac{k_{\text{for},3} K_{\text{eq},1} K_{\text{eq},2} \frac{p_{\text{ethanol}}}{p_{\text{H}_2}}}{1 + K_{\text{eq},1} p_{\text{ethanol}} + K_{\text{eq},1} K_{\text{eq},2} \frac{p_{\text{ethanol}}}{p_{\text{H}_2}}}\end{aligned}$$

The Sabatier rate of acetaldehyde formation is determined by the Sabatier rates of reaction R3. Hence,

$$\text{Rate}[\text{HKUST-1(H)-path-a}] = \text{rate}(\text{R3}) = \frac{k_{\text{for},3} K_{\text{eq},1} K_{\text{eq},2} \frac{p_{\text{ethanol}}}{p_{\text{H}_2}}}{1 + K_{\text{eq},1} p_{\text{ethanol}} + K_{\text{eq},1} K_{\text{eq},2} \frac{p_{\text{ethanol}}}{p_{\text{H}_2}}}$$

Acetaldehyde formation rate has been calculated at the experimental conditions of  $T=453.15$  K with the partial pressures for ethanol, hydrogen and acetaldehyde being 0.05 kPa,  $10^{-6}$  kPa and  $10^{-6}$  kPa respectively.

Following a similar procedure, microkinetic modelling analysis was carried out for both path-b and path-c.

## S2.2 Calculation of Sabatier Rate for Acetaldehyde Formation via Path-b over HKUST-1(H)

The microkinetic model is represented as follows:

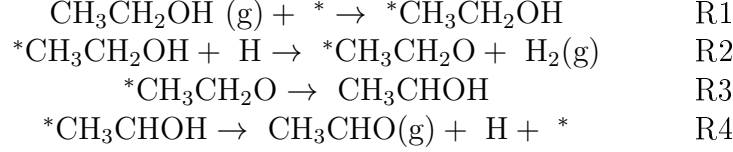

On the basis of calculated Gibbs free energy profile R3 step is assumed to be the rate determining step while all other steps (R1, R2 and R4) are treated as quasi-equilibrium. Considering the surface coverage of all species, we finally obtain,

$$\text{Rate}[\text{HKUST-1(H)-path-b}] = \text{rate}(\text{R3}) = \frac{k_{for,3} K_{eq,1} K_{eq,2} \frac{p_{ethanol}}{p_{H_2}}}{1 + K_{eq,1} p_{ethanol} + K_{eq,1} K_{eq,2} \frac{p_{ethanol}}{p_{H_2}} + \frac{p_{acetaldehyde}}{K_{eq,4}}}$$

### S2.3 Calculation of Sabatier Rate for Acetaldehyde Formation via. Path-c over HKUST-1(H)

The microkinetic model is represented as follows:

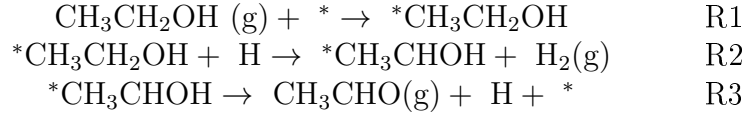

On the basis of calculated Gibbs free energy profile R2 step is assumed to be the rate determining step while all other steps (R1 and R3) are treated as quasi-equilibrium. Considering the surface coverage of all species, we finally obtain,

$$\text{Rate}[\text{HKUST-1(H)-path-c}] = \text{rate}(\text{R2}) = \frac{k_{for,2} K_{eq,1} p_{ethanol}}{1 + K_{eq,1} p_{ethanol} + \frac{p_{acetaldehyde}}{K_{eq,3}}}$$

## S3 Optimized Structures

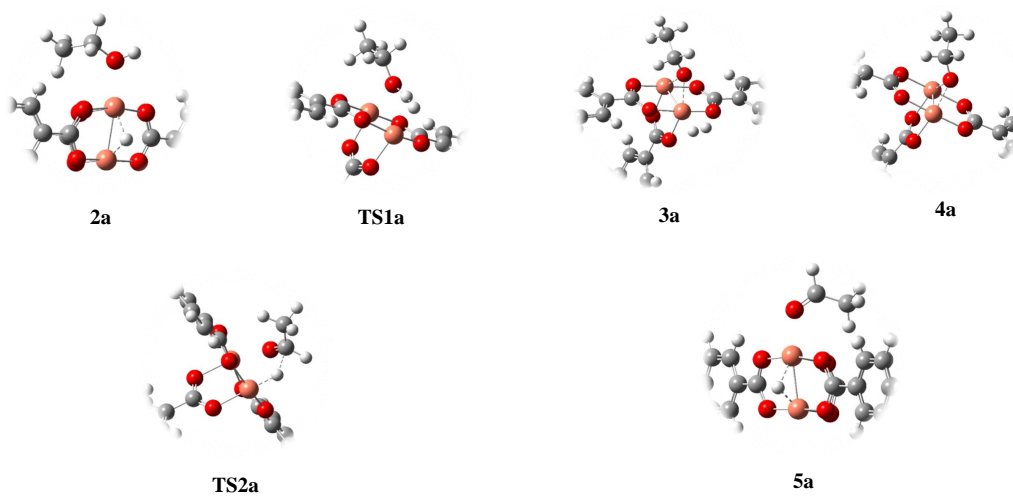

Figure S2: Optimized structures involved in acetaldehyde synthesis via. path-a over HKUST-1(H) MOF node. [Colour code- Cu: orange; O: red; C: grey; H: white]

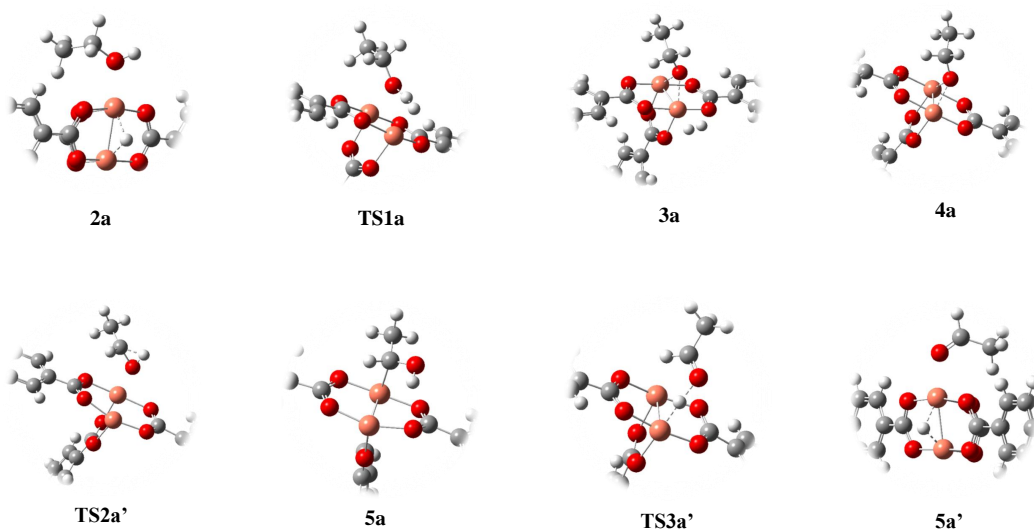

Figure S3: Optimized structures involved in acetaldehyde synthesis via. path-b over HKUST-1(H) MOF node. [Colour code - Cu: orange; O: red; C: grey; H: white]

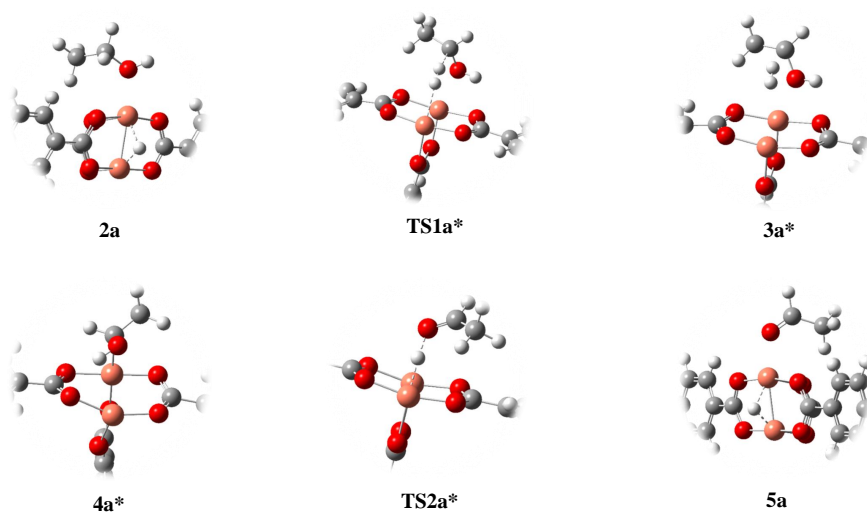

Figure S4: Optimized structures involved in acetaldehyde synthesis via. path-c over HKUST-1(H) MOF node. [Colour code - Cu: orange; O: red; C: grey; H: white]



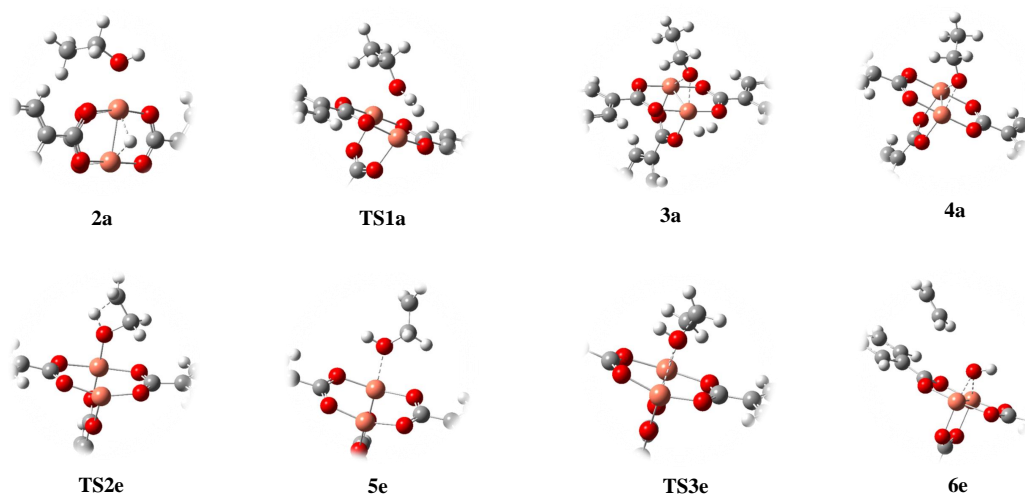

Figure S5: Optimized structures involved in ethylene synthesis over HKUST-1(H) MOF node. [Colour code - Cu: orange; O: red; C: grey; H: white]

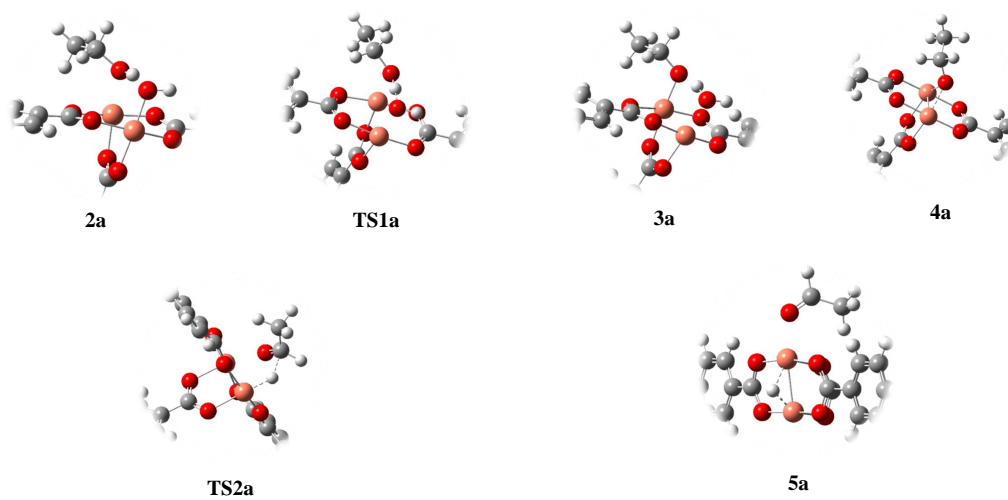

Figure S6: Optimized structures involved in acetaldehyde synthesis via. path-a over HKUST-1(OH) MOF node. [Colour code - Cu: orange; O: red; C: grey; H: white]

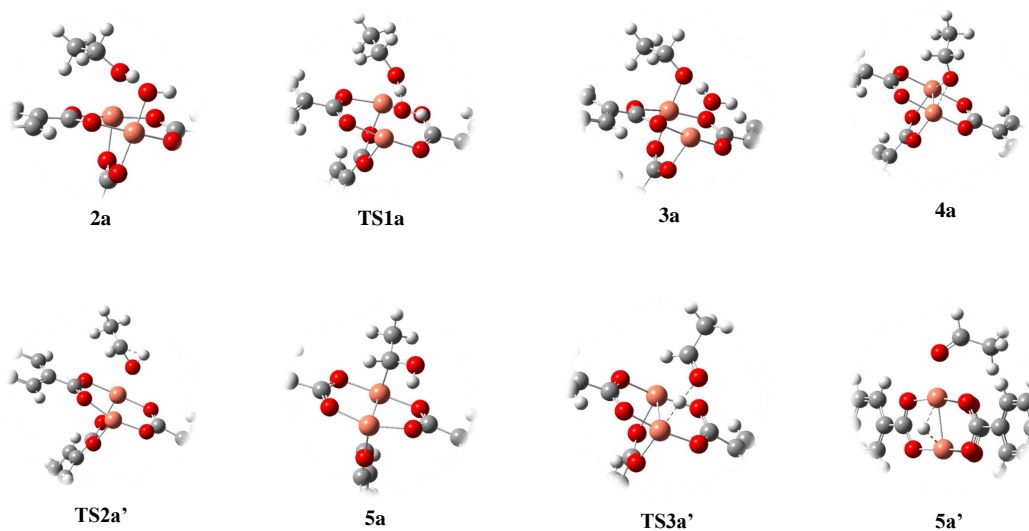

Figure S7: Optimized structures involved in acetaldehyde synthesis via. path-b over HKUST-1(OH) MOF node. [Colour code - Cu: orange; O: red; C: grey; H: white]

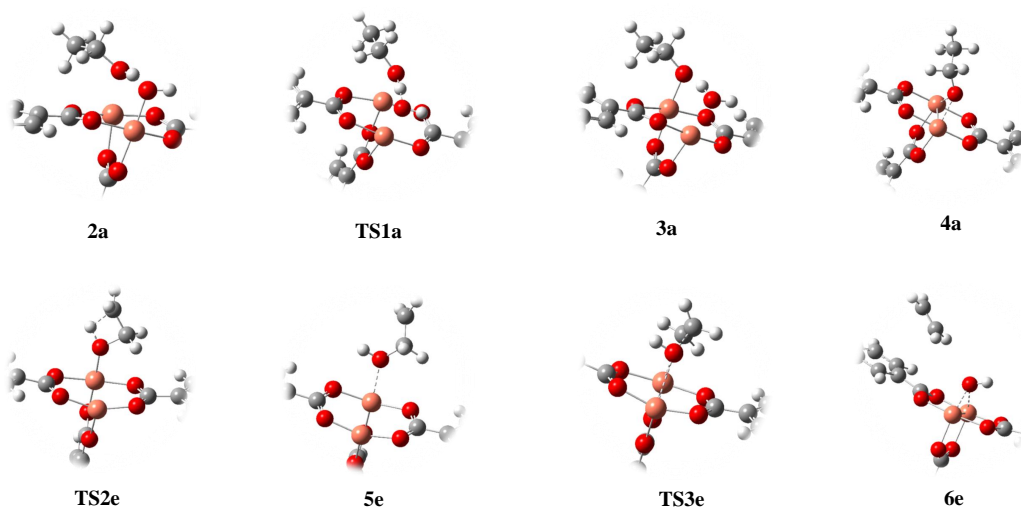

Figure S8: Optimized structures involved in ethylene synthesis over HKUST-1(OH) MOF node. [Colour code - Cu: orange; O: red; C: grey; H: white]

## References

- (1) Xue, W.; Wang, J.; Huang, H.; Cui, Y.; Mei, D. CO Oxidation over HKUST-1 Catalysts: The Role of Defective Sites. *J Phys. Chem. C* **2022**, *126*, 9652–9664.
